# Supplementary material for: Twisted-layer boron nitride ceramic with high deformability and strength
Source: PubMed Central journal article supplement (PMC10881384; doi:10.1038/s41586-024-07036-5), 2024-02-21
Supplement: 41586_2024_7036_MOESM1_ESM.pdf [file 41586_2024_7036_MOESM1_ESM.pdf]

**Supplementary information**

---

**Twisted-layer boron nitride ceramic with high deformability and strength**

---

In the format provided by the authors and unedited

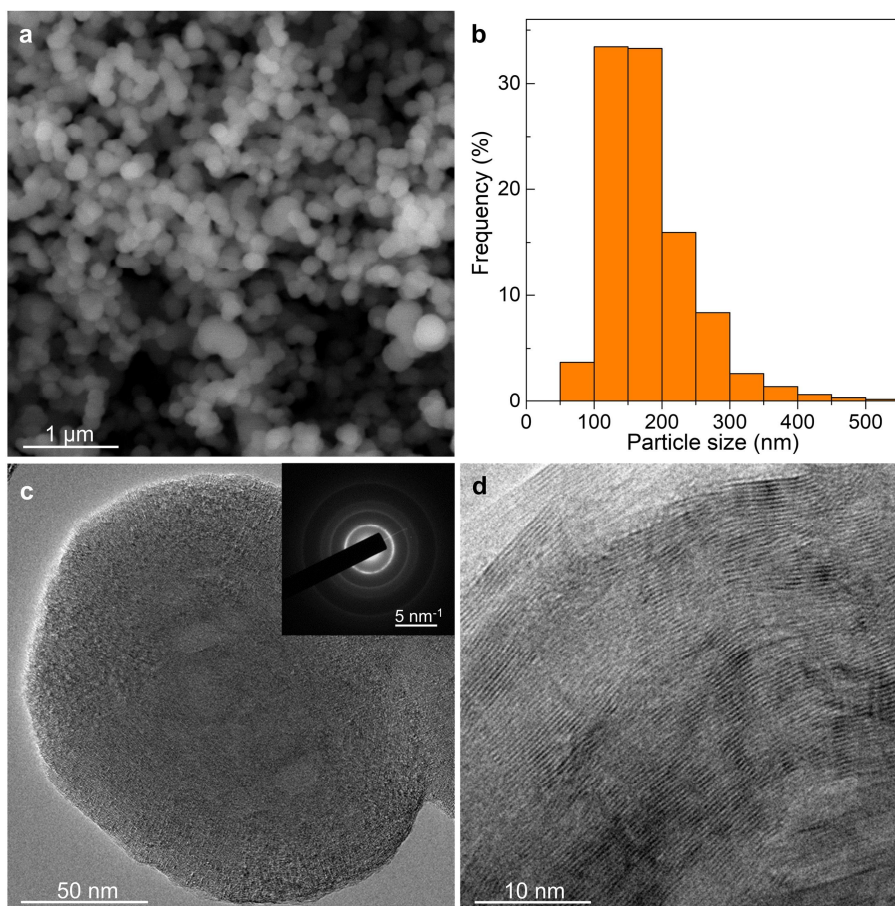

**Supplementary Figure 1 | Microstructure of oBN nanoprecursor. a and b, SEM image and size distribution of oBN nanoparticles. The average size is  $\sim 180$  nm. c and d, TEM images showing that oBN is composed of turbostratic spherical shells with abundant puckering and stacking faults. The inset in c is the corresponding SAED pattern.**

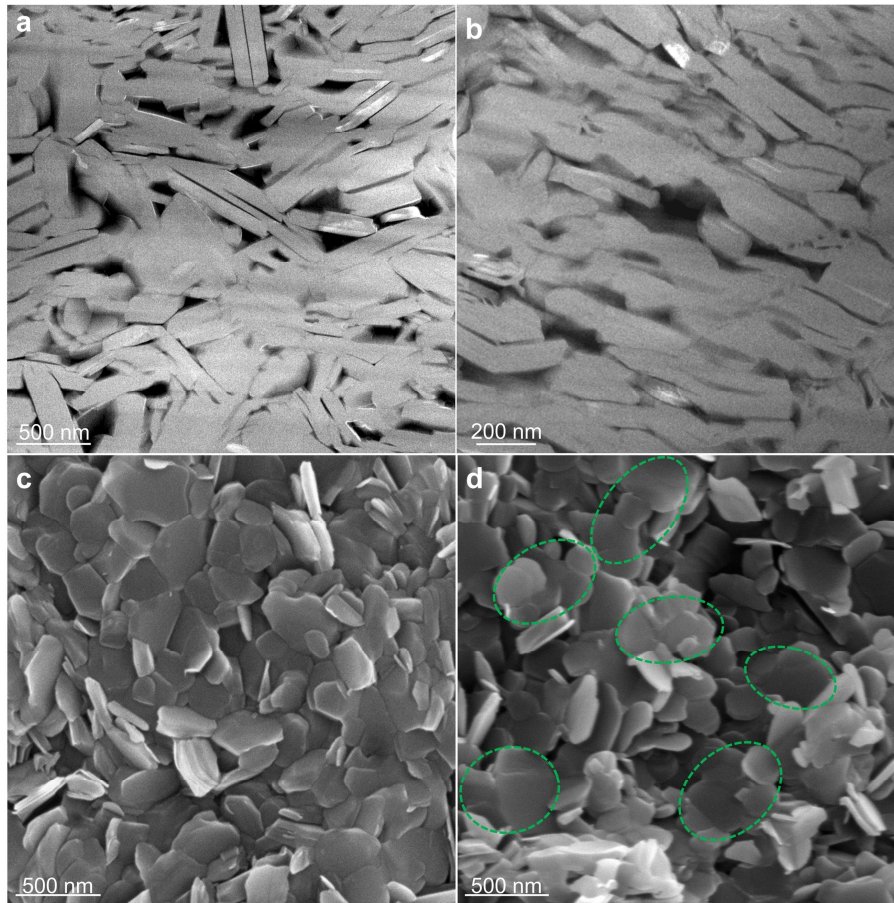

**Supplementary Figure 2 | Microstructure of hBN ceramics prepared by SPS sintering hBN nanosheets before and after compression test. a**, HAADF-STEM image before compression test. The BN nanoplates in ceramic have preferential orientation on the micrometer scale. **b**, HAADF-STEM image after compression test. Microcracks have propagated continuously along the basal planes of the preferentially oriented nanoplates. **c**, Fracture morphology formed by direct breaking hBN ceramic with mechanical pliers. This is the fresh sample without compression test. **d**, Fractured surface after a compression test. The micro-scaled cleavage surfaces composed of several oriented nanoplates were observed (green dotted areas), indicating the low compressive strength (135 MPa) and strain (2.1%) of hBN ceramics.

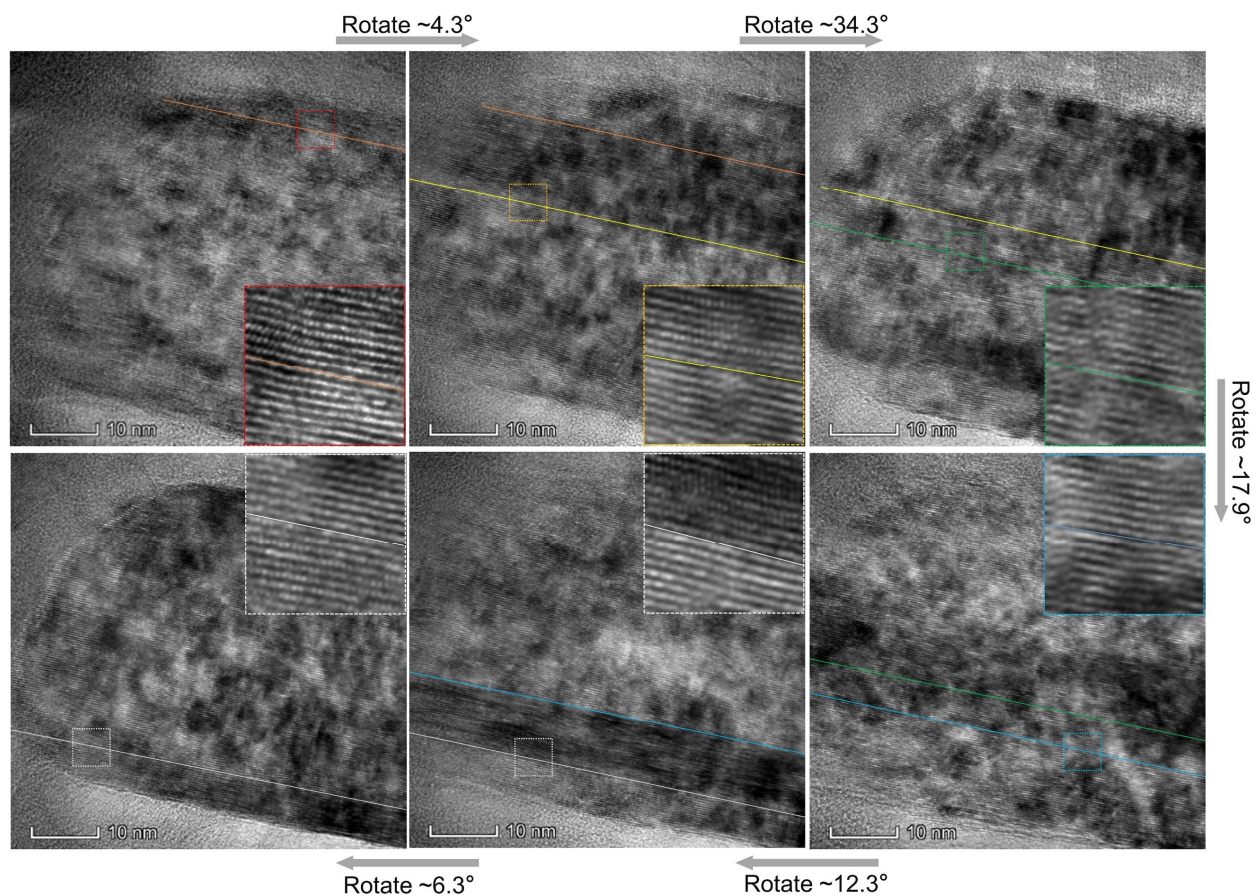

**Supplementary Figure 3 | High-resolution transmission electron microscopy (HRTEM) images of a nanoplate with basal planes viewed edge-on.** The sample is rotated with respect to the normal of the basal plane. Insets show an atom-resolution lattice region with a thickness of several to dozens of layers. As the sample is rotated, different regions of lattice fringes move in and out of focus, as indicated by the colored lines. These regions, referred to as nanoslices, have different orientational relations, but share the same basal plane normal, indicating that they are twisted relative to one another. Insets show the interfaces between adjacent nanoslices, and the atomic-resolution lattice and striped regions were observed at the interface boundary due to the different orientations.

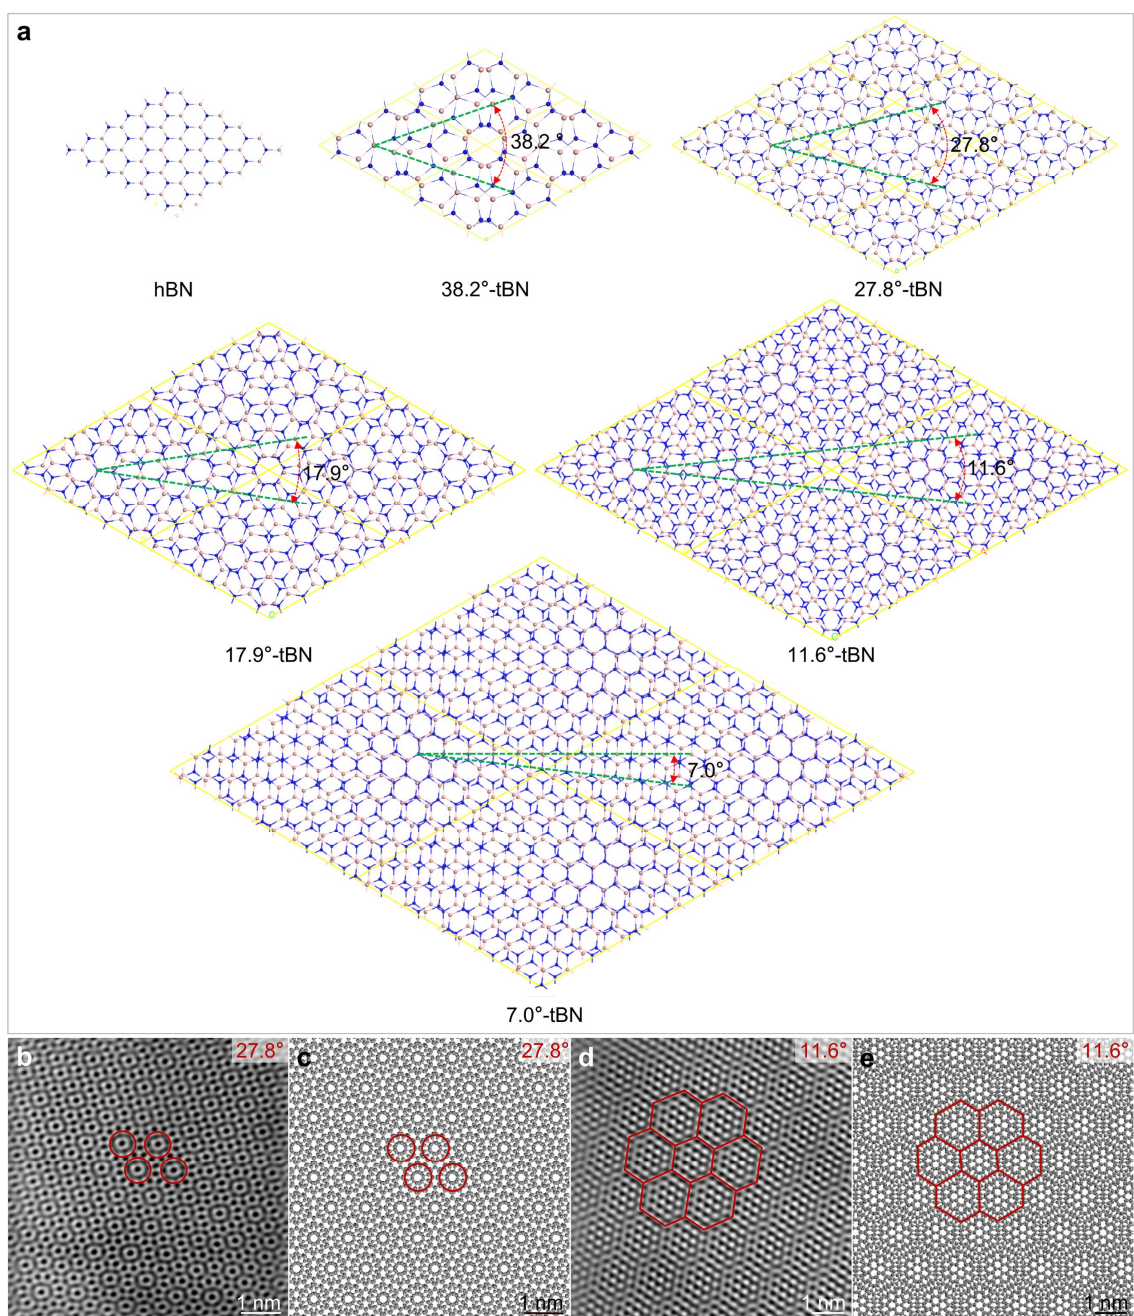

**Supplementary Figure 4 | Hypothetical twist-stacked crystals constructed by twisting every other layer by an angle of  $\theta$  in hBN ( $\theta$ -tBN for short). **a**, Crystal structures of hBN and  $\theta$ -tBN with twist angles of 38.2°, 27.8°, 17.9°, 11.6°, and 7.0°, respectively. **b** and **d**, Observed Moiré patterns in as-sintered TS-BN samples, in which the superimposed nanoslices have twist angles of 27.8° and 11.6°, respectively (Fig. 1e, Extended Data Fig. 4). **c** and **e**, Simulated moiré patterns of 27.8°-tBN and 11.6°-tBN structures. The simulated moiré patterns are in good agreement with the experimental observations.**

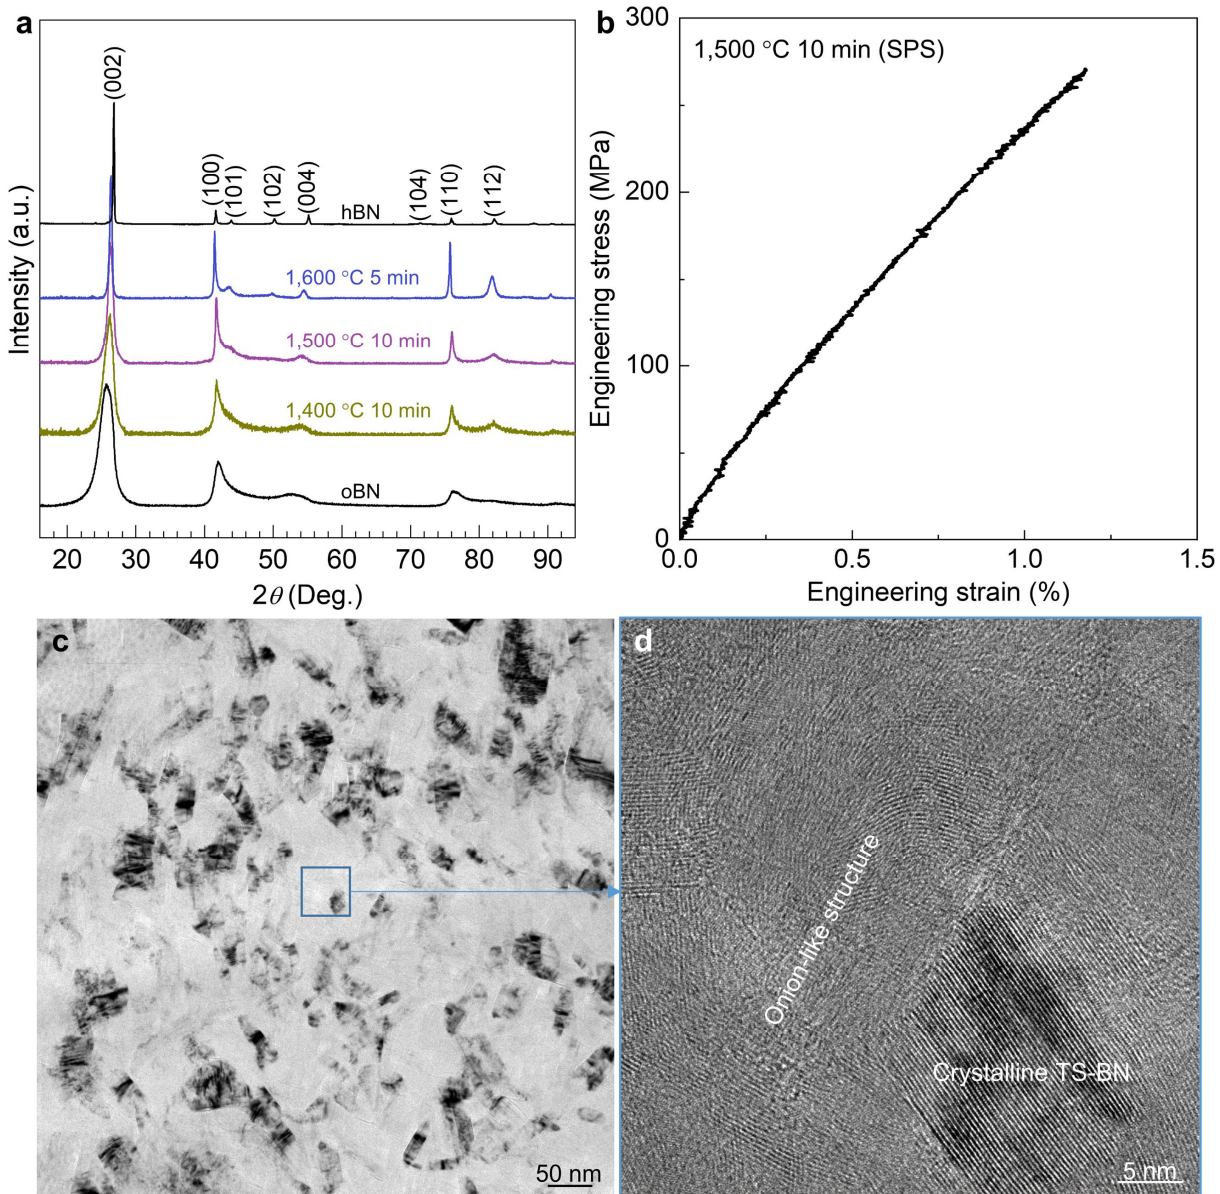

**Supplementary Figure 5 | Microstructure and performance of BN ceramic obtained through SPS at 1,500 °C for 10 min.** **a**, XRD patterns of ceramic samples obtained by sintering oBN at 1,400 °C, 1,500 °C, and 1,600 °C. **b**, Uniaxial compressive stress–strain curve of the 1,500 °C-sintered sample. **c** and **d**, TEM and HRTEM images of 1,500 °C-sintered sample. The crystalline TS-BN and residual untransformed onion-like BN structure can be observed in the sample.

**Supplementary Table 1 | Peak positions ( $2\theta$ ), Miller indices, and relative intensities of simulated diffraction peaks of hypothetical twist-stacked BN structures. The XRD patterns are shown in Extended Data Fig. 5.**

| Structure | $2\theta$ (Deg.) | Miller indices | Relative intensity | $2\theta$ (Deg.) | Miller indices | Relative intensity | $2\theta$ (Deg.) | Miller indices | Relative intensity |
|-----------|------------------|----------------|--------------------|------------------|----------------|--------------------|------------------|----------------|--------------------|
| hBN       | 26.75            | (0 0 2)        | 100.0              | 44.1             | (1 0 1)        | 5.3                | 55.15            | (0 0 4)        | 7.1                |
|           | 41.85            | (1 0 0)        | 16.4               | 50.35            | (1 0 2)        | 15.8               |                  |                |                    |
| 38.2-I    | 25.70            | (0 0 2)        | 100.0              | 43.93            | (2 1 1)        | 13.8               | 52.86            | (0 0 4)        | 7.5                |
|           | 41.85            | (2 1 0)        | 8.3                | 49.76            | (2 1 2)        | 8.4                |                  |                |                    |
| 38.2-II   | 26.13            | (0 0 4)        | 100.0              | 43.99            | (2 1 2)        | 2.4                | 53.75            | (0 0 8)        | 7.4                |
|           | 41.84            | (2 1 0)        | 7.3                | 46.57            | (2 1 3)        | 5.8                | 54.18            | (2 1 5)        | 3.2                |
|           | 42.39            | (2 1 1)        | 8.3                | 50.00            | (2 1 4)        | 7.3                |                  |                |                    |
| 38.2-III  | 26.34            | (0 0 6)        | 100.0              | 44.03            | (2 1 3)        | 3.8                | 52.87            | (2 1 7)        | 2.8                |
|           | 41.84            | (2 1 0)        | 7.7                | 45.67            | (2 1 4)        | 1.0                | 54.22            | (0 0 12)       | 7.3                |
|           | 42.09            | (2 1 1)        | 6.6                | 47.71            | (2 1 5)        | 3.9                | 55.92            | (2 1 8)        | 0.3                |
|           | 42.82            | (2 1 2)        | 1.2                | 50.12            | (2 1 6)        | 7.6                |                  |                |                    |
| 38.2-IV   | 26.40            | (0 0 8)        | 100.0              | 44.03            | (2 1 4)        | 2.5                | 52.19            | (2 1 9)        | 2.8                |
|           | 41.84            | (2 1 0)        | 7.5                | 45.23            | (2 1 5)        | 1.8                | 54.35            | (0 0 16)       | 7.3                |
|           | 41.98            | (2 1 1)        | 6.6                | 48.30            | (2 1 7)        | 3.8                | 56.78            | (2 1 11)       | 0.7                |
|           | 43.08            | (2 1 3)        | 2.1                | 50.15            | (2 1 8)        | 7.5                |                  |                |                    |
| 38.2-V    | 26.40            | (0 0 10)       | 100.0              | 44.03            | (2 1 5)        | 3.0                | 51.77            | (2 1 11)       | 2.9                |
|           | 41.84            | (2 1 0)        | 7.6                | 44.97            | (2 1 6)        | 1.0                | 54.45            | (0 0 20)       | 7.3                |
|           | 41.93            | (2 1 1)        | 6.3                | 46.06            | (2 1 7)        | 0.6                | 55.34            | (2 1 13)       | 0.3                |
|           | 42.20            | (2 1 2)        | 0.2                | 47.29            | (2 1 8)        | 0.1                | 57.28            | (2 1 14)       | 0.3                |
|           | 42.64            | (2 1 3)        | 0.9                | 48.66            | (2 1 9)        | 3.4                |                  |                |                    |
|           | 43.26            | (2 1 4)        | 1.1                | 50.16            | (2 1 10)       | 7.6                |                  |                |                    |
| 38.2-VI   | 26.46            | (0 0 12)       | 100.0              | 44.04            | (2 1 6)        | 2.5                | 51.53            | (2 1 13)       | 3.0                |
|           | 41.84            | (2 1 0)        | 7.6                | 44.82            | (2 1 7)        | 1.4                | 54.45            | (2 1 15)       | 0.3                |
|           | 41.90            | (2 1 1)        | 6.4                | 46.68            | (2 1 9)        | 0.7                | 54.48            | (0 0 24)       | 7.3                |
|           | 42.40            | (2 1 3)        | 0.9                | 48.93            | (2 1 11)       | 3.4                | 57.67            | (2 1 17)       | 0.4                |
|           | 43.38            | (2 1 5)        | 1.4                | 50.19            | (2 1 12)       | 7.5                |                  |                |                    |
| 27.8-I    | 25.73            | (0 0 2)        | 100.0              | 43.94            | (3 1 1)        | 13.9               | 52.89            | (0 0 4)        | 7.5                |
|           | 41.85            | (3 1 0)        | 8.3                | 49.78            | (3 1 2)        | 8.4                |                  |                |                    |
| 27.8-II   | 26.14            | (0 0 4)        | 100.0              | 43.99            | (3 1 2)        | 2.4                | 53.69            | (0 0 8)        | 7.4                |
|           | 41.84            | (3 1 0)        | 7.3                | 46.56            | (3 1 3)        | 5.8                | 54.15            | (3 1 5)        | 3.2                |
|           | 42.39            | (3 1 1)        | 8.3                | 49.98            | (3 1 4)        | 7.3                |                  |                |                    |
| 27.8-III  | 26.32            | (0 0 6)        | 100.0              | 44.02            | (3 1 3)        | 3.8                | 52.85            | (3 1 7)        | 2.8                |
|           | 41.84            | (3 1 0)        | 7.6                | 45.66            | (3 1 4)        | 1.0                | 54.18            | (0 0 12)       | 7.3                |
|           | 42.09            | (3 1 1)        | 6.6                | 47.70            | (3 1 5)        | 3.9                | 55.90            | (3 1 8)        | 0.3                |
|           | 42.82            | (3 1 2)        | 1.2                | 50.11            | (3 1 6)        | 7.6                |                  |                |                    |
| 27.8-IV   | 26.43            | (0 0 8)        | 100.0              | 44.04            | (3 1 4)        | 2.5                | 52.22            | (3 1 9)        | 2.8                |
|           | 41.84            | (3 1 0)        | 7.6                | 45.24            | (3 1 5)        | 1.8                | 54.42            | (0 0 16)       | 7.3                |
|           | 41.98            | (3 1 1)        | 6.6                | 48.32            | (3 1 7)        | 3.8                | 56.81            | (3 1 11)       | 0.7                |
|           | 43.09            | (3 1 3)        | 2.1                | 50.17            | (3 1 8)        | 7.5                |                  |                |                    |
| 27.8-V    | 26.43            | (0 0 10)       | 100.0              | 44.04            | (3 1 5)        | 3.0                | 51.79            | (3 1 11)       | 2.8                |
|           | 41.84            | (3 1 0)        | 7.6                | 44.98            | (3 1 6)        | 0.9                | 54.42            | (0 0 20)       | 7.3                |
|           | 41.93            | (3 1 1)        | 6.3                | 46.07            | (3 1 7)        | 0.6                | 55.36            | (3 1 13)       | 0.3                |
|           | 42.20            | (3 1 2)        | 0.2                | 47.30            | (3 1 8)        | 0.1                | 57.31            | (3 1 14)       | 0.3                |
|           | 42.64            | (3 1 3)        | 0.9                | 48.67            | (3 1 9)        | 3.5                |                  |                |                    |
|           | 43.26            | (3 1 4)        | 1.1                | 50.17            | (3 1 10)       | 7.6                |                  |                |                    |
| 27.8-VI   | 26.46            | (0 0 12)       | 100.0              | 44.03            | (3 1 6)        | 2.5                | 51.50            | (3 1 13)       | 2.9                |
|           | 41.83            | (3 1 0)        | 7.6                | 44.80            | (3 1 7)        | 1.3                | 54.41            | (0 0 24)       | 7.3                |
|           | 41.89            | (3 1 1)        | 6.3                | 46.66            | (3 1 9)        | 0.7                | 54.42            | (3 1 15)       | 0.4                |
|           | 42.39            | (3 1 3)        | 1.0                | 48.90            | (3 1 11)       | 3.5                | 57.63            | (3 1 17)       | 0.4                |
|           | 43.37            | (3 1 5)        | 1.5                | 50.16            | (3 1 12)       | 7.5                |                  |                |                    |

**Supplementary Table 2 | Strength and strain of traditional bulk ceramics under uniaxial compression at room temperature. Young's moduli of traditional ceramics were also listed.**

| Ceramic                        | Compressive strength (MPa) | Young's modulus (GPa) | Elastic strain (%) | Plastic strain (%) | Total strain (%) | Reference |
|--------------------------------|----------------------------|-----------------------|--------------------|--------------------|------------------|-----------|
| CeO <sub>2</sub> -PSZ          | 1,717                      |                       | 0.83               | 0.47               | 1.3              | 51        |
| Mg-PSZ                         | 1,860                      |                       | 0.9                | 1.2                | 2.1              | 25        |
| MgO                            | 833                        | 270                   | 0.31*              | 0.038              | 0.348            | 52        |
| MgO                            | 1,667                      | 330                   | 0.505*             | 0.041              | 0.546            |           |
| MgO                            | 627                        |                       | 0.595              |                    | 0.595            | 53        |
| Al <sub>2</sub> O <sub>3</sub> | 2,100                      |                       | 0.524              |                    | 0.524            | 54        |
| Al <sub>2</sub> O <sub>3</sub> | 3,000                      | 370                   | 0.81*              |                    | 0.81             | 55        |
| Al <sub>2</sub> O <sub>3</sub> | 4,000                      | 406                   | 0.99*              |                    | 0.99             |           |
| Al <sub>2</sub> O <sub>3</sub> | 2,600                      | 350                   | 0.74*              |                    | 0.74             |           |
| AlN                            | 1,970                      | 302                   | 0.652*             | 0.061              | 0.713            | 56        |
| AlN                            | 2,700                      | 348                   | 0.776*             | 0.083              | 0.859            |           |
| AlN                            | 4,350                      |                       | 1.4                |                    | 1.4              | 57        |
| AlN                            | 2,877                      |                       | 0.836              |                    | 0.836            |           |
| Si <sub>3</sub> N <sub>4</sub> | 2,000                      | 280                   | 0.714*             |                    | 0.714            | 55        |
| Si <sub>3</sub> N <sub>4</sub> | 3,500                      | 310                   | 1.129*             |                    | 1.129            |           |
| Si <sub>3</sub> N <sub>4</sub> | 5,500                      | 297                   | 1.852*             | 0.169              | 2.021            | 58        |
| SiC                            | 3,734                      |                       | 0.805              |                    | 0.805            | 24        |
| SiC                            | 3,987                      |                       | 0.866              |                    | 0.866            |           |
| SiC                            | 5,937                      |                       | 1.182              |                    | 1.182            |           |
| SiC                            | 6,115                      | 460                   | 1.257              |                    | 1.257            |           |
| SiC                            | 6,115                      | 460                   | 1.257              |                    | 1.257            |           |
| B <sub>4</sub> C               | 2,900                      | 445                   | 0.652              |                    | 0.652            | 59        |
| B <sub>4</sub> C               | 4,500                      | 464                   | 0.97               |                    | 0.97             |           |
| B <sub>4</sub> C               | 6,200                      | 464                   | 1.336              |                    | 1.336            |           |
| B <sub>4</sub> C               | 6,200                      | 464                   | 1.336              |                    | 1.336            |           |
| B <sub>4</sub> C               | 2,583                      | 362                   | 0.714*             | 0.058              | 0.772            | 60        |
| B <sub>4</sub> C               | 5,687                      | 472                   | 1.205*             | 0.124              | 1.329            |           |
| Diamond                        | 8,680                      | 700                   | 1.24*              |                    | 1.24             | 55        |
| Diamond                        | 16,530                     | 1,200                 | 1.378*             |                    | 1.378            |           |
| Diamond                        | 6,900                      | 953                   | 0.724*             |                    | 0.724            |           |
| Diamond                        | 4,500                      | 800                   | 0.563*             |                    | 0.563            |           |
| Diamond                        | 5,800                      | 925                   | 0.627*             |                    | 0.627            |           |
| Diamond                        | 10,000                     | 1,050                 | 0.952*             | 0.241              | 1.193            | 61        |
| Diamond                        | 20,000                     | 1,210                 | 1.653*             | 0.267              | 1.92             |           |
| Ti <sub>2</sub> AlC            | 912                        |                       | 0.96               |                    | 0.96             | 62        |
| Ti <sub>2</sub> AlC            | 1,027                      |                       | 1.0                | 0.13               | 1.13             | 63        |
| Ti <sub>2</sub> AlC            | 606                        |                       | 0.69               | 0.18               | 0.87             |           |
| Ti <sub>2</sub> AlC            | 1,123                      |                       |                    |                    | 0.92             | 64        |
| Cr <sub>2</sub> AlC            | 1,160                      |                       |                    |                    | 0.61             | 65        |
| Cr <sub>2</sub> AlC            | 985                        |                       |                    |                    | 0.52             |           |
| Ti <sub>2</sub> SC             | 1,400                      |                       |                    |                    | 0.45             | 66        |
| SiO <sub>2</sub>               | 690                        | 73                    | 0.94*              |                    | 0.94             | 67        |
| SiO <sub>2</sub>               | 1,380                      | 73                    | 1.89*              |                    | 1.89             |           |
| Graphite                       | 78                         | 11                    |                    |                    | 2.1              | 68        |
| hBN                            | 112                        |                       | 1.1                | 1.1                | 2.2              | 16        |
| hBN                            | 82                         |                       |                    |                    | 1.9              |           |

\*Elastic strain estimated from the formula  $\epsilon = \sigma/E$ , where  $\epsilon$  was elastic strain,  $\sigma$  and  $E$  were the compressive strength and Young's modulus obtained from experiments, respectively.



**Supplementary Table 3 | Compressive strength (MPa), fracture strain (%), flexural strength (MPa), tensile strength (MPa), Young's moduli (GPa) and fracture toughness  $K_{IC}$  (MPa·m<sup>1/2</sup>) of TS-BN and hBN ceramics.**

| Samples            | Compressive strength±s.d. (n=5) | Fracture strain±s.d. (n=5) | Flexural strength±s.d. (n=5) | Tensile strength±s.d. (n=5) | Young's modulus±s.d. (n=5) | $K_{IC}$ ±s.d. (n=5) |
|--------------------|---------------------------------|----------------------------|------------------------------|-----------------------------|----------------------------|----------------------|
| TS-BN <sup>a</sup> | 626.2±12.3                      | 13.6±0.58                  | 199.2±8.7                    | 59.1±4.9                    | 54±4.8                     | 1.96±0.17            |
| hBN <sup>b</sup>   | 135.2±4.2                       | 2.1±0.26                   | 60.8±3.7                     | 14.8±1.2                    | 58±5.1                     | 0.78±0.13            |
| hBN <sup>c</sup>   | 57.4±3.8                        | 0.6±0.14                   | 22.0±1.9                     | 15.3±1.5                    | 61±5.6                     | 0.39±0.11            |

<sup>a</sup> TS-BN ceramic sintered by SPS at 1,600 °C for 5 min.

<sup>b</sup> Home-made hBN ceramic prepared by sintering hBN nanosheets at 1,800 °C for 10 min.

<sup>c</sup> Commercial hBN ceramic.

Error bars indicate 1 s.d. (n=5 for compressive strength, fracture strain, flexural strength, tensile strength, Young's moduli, and  $K_{IC}$ ).

**Supplementary Table 4 | Compressive strength (MPa) and fracture strain (%) of TS-BN ceramics synthesized by SPS and hot-pressing (HP) sintering under varying conditions.**

| Samples | T (°C)/Time (min)/<br>Sintering method | Compressive<br>strength±s.d.<br>(n=5) | Fracture strain±s.d.<br>(n=5) |
|---------|----------------------------------------|---------------------------------------|-------------------------------|
| TS-BN   | 1,600 / 5 / SPS                        | 626.2±12.3                            | 13.6±0.58                     |
| TS-BN   | 1,600 / 10 / SPS                       | 453.9±13.5                            | 10.7±0.45                     |
| TS-BN   | 1,700 / 10 / SPS                       | 332.3±9.1                             | 4.1±0.27                      |
| TS-BN   | 1,650 / 5 / HP                         | 772.5±14.7                            | 10.2±0.66                     |
| TS-BN   | 1,750 / 5 / HP                         | 545.6±9.2                             | 6.7±0.47                      |
| TS-BN   | 1,850 / 5 / HP                         | 350.7±7.9                             | 6.1±0.62                      |

Error bars indicate 1 s.d. (n=5).

**Supplementary Table 5 | DFT-calculated cleavage energy ( $E_c$ ), slipping energy ( $E_s$ ), in-plane Young's modulus ( $Y$ ) along the slipping direction, and the resulting deformability factor ( $\Xi$ ) of hypothetical  $\theta$ -tBN crystals with twist-stacked structure.**

| Twist angle ( $\theta$ , °)           | 0                     | 38.2                 | 27.8                 | 17.9                  | 11.6                 |
|---------------------------------------|-----------------------|----------------------|----------------------|-----------------------|----------------------|
| Cleavage energy ( $E_c$ , eV/atom)    | 0.0210                | 0.0225               | 0.0225               | 0.0224                | 0.0225               |
| Slipping energy ( $E_s$ , eV/atom)    | $6.92 \times 10^{-3}$ | $8.7 \times 10^{-5}$ | $8.8 \times 10^{-5}$ | $11.8 \times 10^{-5}$ | $6.3 \times 10^{-5}$ |
| Young's modulus ( $Y$ , GPa)          | 851.5                 | 820.8                | 821.2                | 820.6                 | 819.4                |
| Deformability factor ( $\Xi$ , 1/GPa) | 0.00356               | 0.3140               | 0.3118               | 0.2309                | 0.4355               |

## References

51. Tsai, J. F., Chon, U., Ramachandran, N. & Shetty, D. K. Transformation plasticity and toughening in CeO<sub>2</sub> - partially - stabilized zirconia–alumina (Ce-TZP/Al<sub>2</sub>O<sub>3</sub>) composites doped with MnO. *J Am. Ceram. Soc.* **75**, 1229-1238 (1992).
52. Cotton, J. The property data of "*Magnesia-magnesium oxide (MgO) properties & applications*". AZoM, <https://www.azom.com/article.aspx?ArticleID=54> (2019)
53. Crampon, J. & Escaig, B. Mechanical properties of fine-grained magnesium oxide at large compressive strains. *J Am. Ceram. Soc.* **63**, 680-686 (1980).
54. Shackelford, J. F. *Introduction to materials science for engineers*. (Prentice Hall, Englewood Cliffs, NJ, 1996).
55. Matweb, Material property data, <https://www.matweb.com/index.aspx> (2022)
56. Davey, R. The property data of "*Aluminium nitride / aluminum nitride (AlN) - Properties and applications*". AZoM, <https://www.azom.com/article.aspx?ArticleID=610> (2022)
57. Subhash, G. & Ravichandran, G. Mechanical behaviour of a hot pressed aluminum nitride under uniaxial compression. *J Mater. Sci.* **33**, 1933-1939 (1998).
58. Sorrell, C. The property data of "*Silicon nitride (Si<sub>3</sub>N<sub>4</sub>) properties and applications*". AZoM, <https://www.azom.com/article.aspx?ArticleID=53> (2001)
59. Blumenthal, W. R. "High strain rate compression testing of ceramics and ceramic composites" in J. J. Swab Ed., *Advances in Ceramic Armor. Ceram. Eng. Sci. Proc.* **26**, 89-96 (2005).
60. Cotton, J. The property data of "*Boron carbide (B<sub>4</sub>C) - Properties and information about boron carbide*". AZoM, <https://www.azom.com/article.aspx?ArticleID=75> (2001)
61. Baily, S. The property data of "*Diamond (C) - Properties and applications*". AZoM, <https://www.azom.com/article.aspx?ArticleID=262> (2001)
62. Poon, B., Ponson, L., Zhao, J. & Ravichandran G. Damage accumulation and hysteretic behavior of MAX phase materials. *J Mech. Phys. Solids* **59**, 2238-2257 (2011).
63. Benitez, R. *et al.* Mechanical properties and microstructure evolution of Ti<sub>2</sub>AlC under compression in 25-1100°C temperature range. *Acta Mater.* **189**, 154-165 (2020).
64. Hu, L. *et al.* High-performance metal/carbide composites with far-from-equilibrium compositions and controlled microstructures. *Sci. Rep.* **6**, 35523 (2016).
65. Tian, W., Sun, Z.M., Hashimoto, H. & Du, Y. Compressive deformation behavior of ternary compound Cr<sub>2</sub>AlC. *J Mater. Sci.* **44**, 102-107 (2009).
66. Amini, S., Barsoum, M. W. & El-Raghy, T. Synthesis and mechanical properties of fully dense Ti<sub>2</sub>SC. *J Am. Ceram. Soc.* **90**, 3953-3958 (2007).
67. Murray, L. The property data of "*Silica - Silicon Dioxide (SiO<sub>2</sub>)*". AZoM, <https://www.azom.com/article.aspx?ArticleID=1114> (2001)
68. Seldin, E. J. Stress-strain properties of polycrystalline graphites in tension and compression at room temperature, *Carbon* **4**, 177-191 (1966).
